# Supplementary material for: Polarized resonance synchronous spectroscopy as a powerful tool for studying the kinetics and optical properties of aggregation-induced emission
Source: Royal Society of Chemistry journal article supplement (doi:10.1039/c9tc04106k), 2019-01-01
Supplement: c9tc04106k1.pdf [file c9tc04106k1.pdf]

## Supporting Information

# Polarized Resonance Synchronous Spectroscopy as a Powerful Tool for Studying the Kinetics and Optical Properties of Aggregation-Induced Emission

*Joanna Xiuzhu Xu,<sup>‡</sup> Guangle Niu,<sup>Δ</sup> Ben Zhong Tang,<sup>Δ</sup> and Dongmao Zhang<sup>\*,‡</sup>*

<sup>‡</sup> Department of Chemistry, Mississippi State University, Mississippi State, Mississippi, 39762, United States

<sup>Δ</sup> Department of Chemistry, The Hong Kong University of Science and Technology, Clear Water Bay, Kowloon, 999077, Hong Kong, China

\* Corresponding authors: [Dongmao@chemistry.msstate.edu](mailto:Dongmao@chemistry.msstate.edu)

## **Content**

|                                                                                                |           |
|------------------------------------------------------------------------------------------------|-----------|
| <b>1. PRS2 data analysis and DLS data spectra for TPMN water fraction series samples .....</b> | <b>S3</b> |
| <b>2. UV-vis, SSF, and PAOS spectra of water series samples .....</b>                          | <b>S4</b> |
| <b>3. PRS2 data analysis and DLS data for TPMN concentration series samples .....</b>          | <b>S5</b> |
| <b>4 As-acquired spectra of the TPMN aggregates as function of the sample incubation.....</b>  | <b>S6</b> |
| <b>5. Photographs and as-acquired data for disaggregation of TPMN aggregates .....</b>         | <b>S7</b> |

## 1. PRS2 data analysis and DLS data spectra for TPMN water fraction series samples

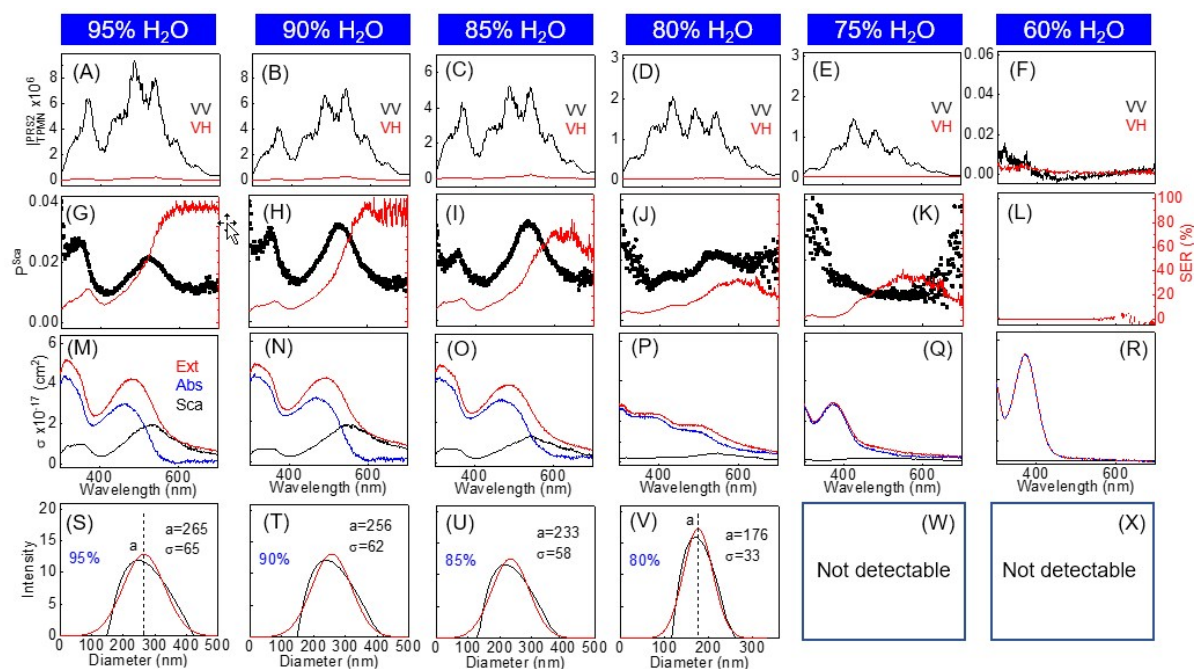

**Figure S1.** (1<sup>st</sup> row) PRS2 VV and VH spectra of aggregated TPMN in different water fractions. The spectra are taken with 4 mm x 4 mm cuvette with 1 nm slit width to avoid signal saturation. All spectra are IFE-corrected and solvent- cuvette- background corrected. (2<sup>nd</sup> row) scattering depolarization and scattering-to-extinction (SER) spectra. (3<sup>rd</sup> row) Extinction, absorption and scattering cross-section spectra normalized by nominal concentration for each TPMN molecules. (4<sup>th</sup> row) DLS data. The data is fitted with Gaussian distribution with the indicated mean and standard deviation

## 2. UV-vis, SSF, and PAOS spectra of water series samples

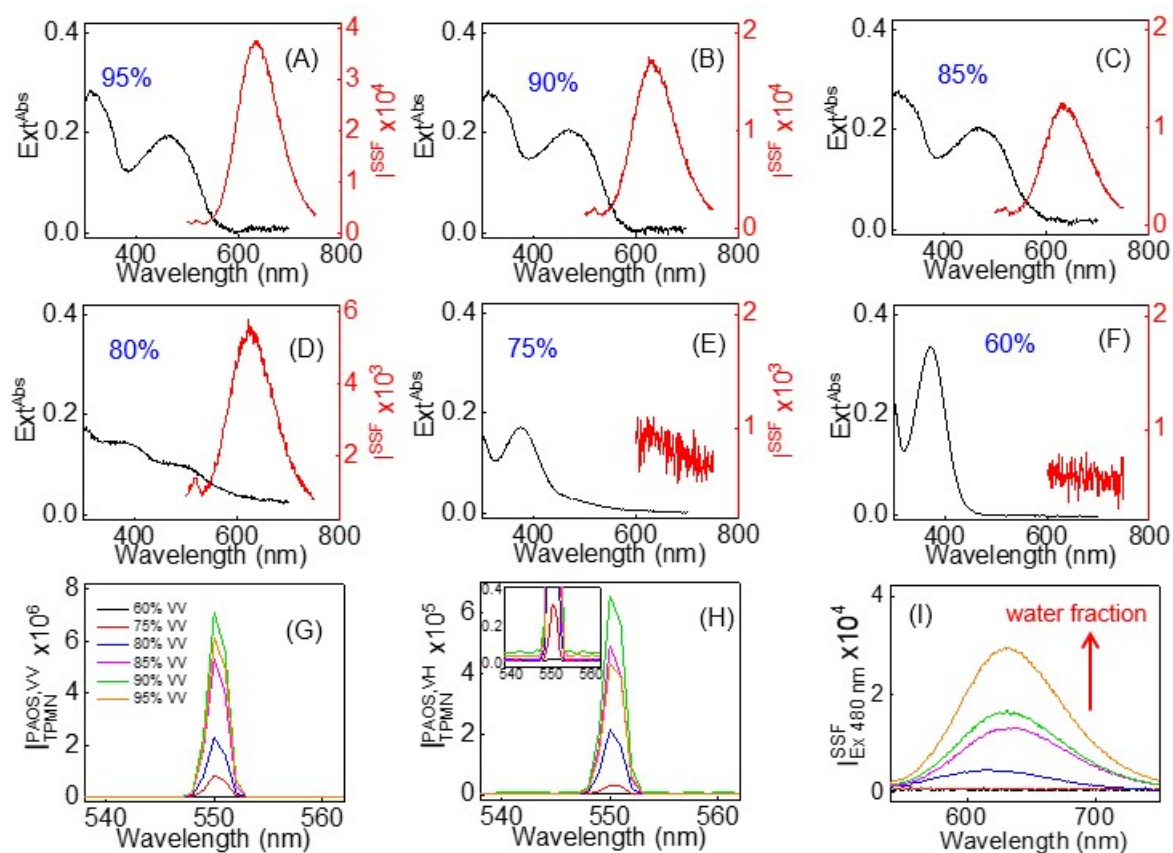

**Figure S2.** UV-vis absorption and SSF spectra of 25  $\mu$ M aggregated TPMN in (A) 95%, (B) 90%, (C) 85%, (D) 80%, (E) 75%, and (F) 60% water. (G) PAOS VV spectra and (H) PAOS VH spectra of water series samples excited at 550 nm where their respective UV-vis spectrum overlaps with SSF spectrum (A-F). Inset in (H) is the zoom-in of PAOS VH showing no fluorescence contribution. All PAOS signal is attributed to scattering with no ORF detected. (I) As-acquired SSF spectra for water fraction series samples.

### 3. PRS2 data analysis and DLS data for TPMN concentration series samples

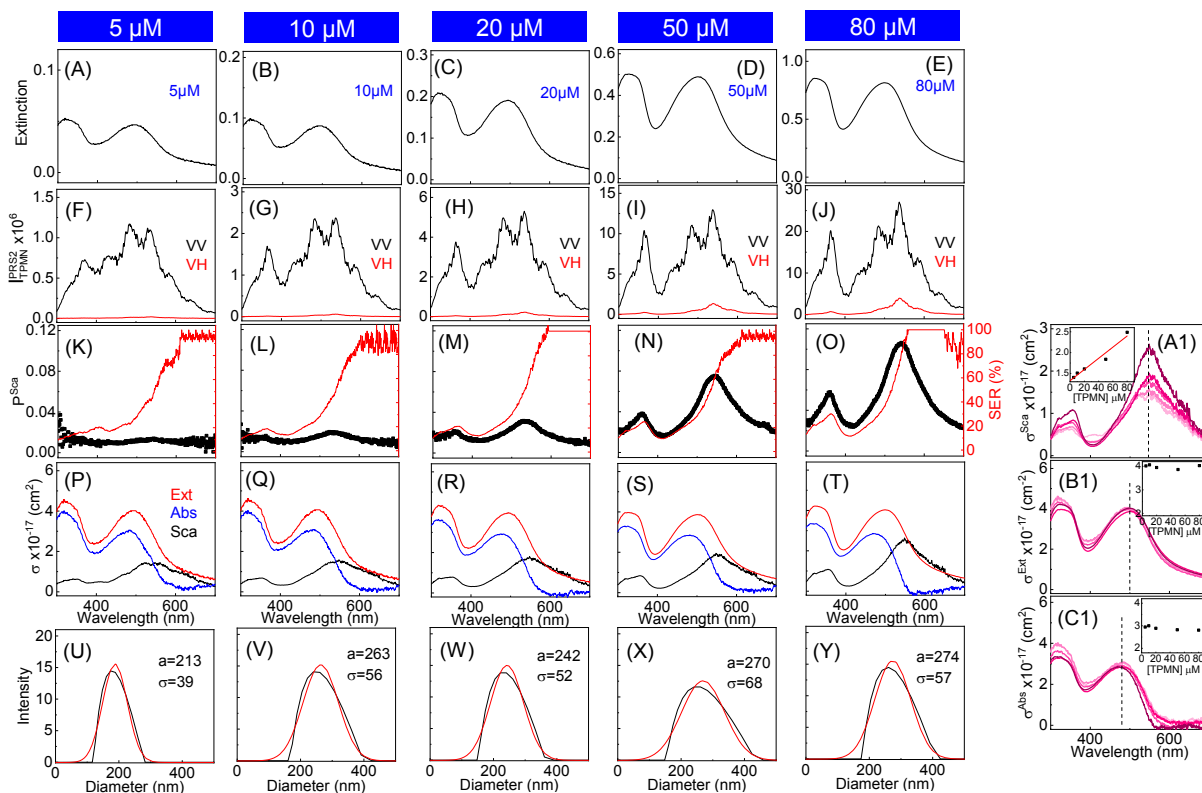

**Figure S3.** (1st row, A-E) UV-vis extinction spectra for aggregated TPMN with different concentrations highlighted on top. (2nd row, F-J) PRS2 VV and VH spectra. The spectra are taken with 4 mm x4 mm cuvette with 1 nm slit width to avoid signal saturation. All spectra are IFE-corrected and solvent- cuvette- background corrected. (3rd row, K-O) scattering depolarization and scattering-to-extinction (SER) spectra. (4th row, P-T) Extinction, absorption and scattering cross-section spectra normalized by nominal concentration for each TPMN molecules. (5th row, U-Y) DLS data. (A1-C1) Reorganized cross-section data from (P) to (T): (A1) Scattering cross-section, (B1) extinction cross-section, and (C1) absorption cross-section spectra of different DPMN concentrations. (Insets) the cross-section at the wavelengths indicated with dash lines as a function of DPMN concentration

#### 4. As-acquired spectra of the TPMN aggregates as function of the sample incubation

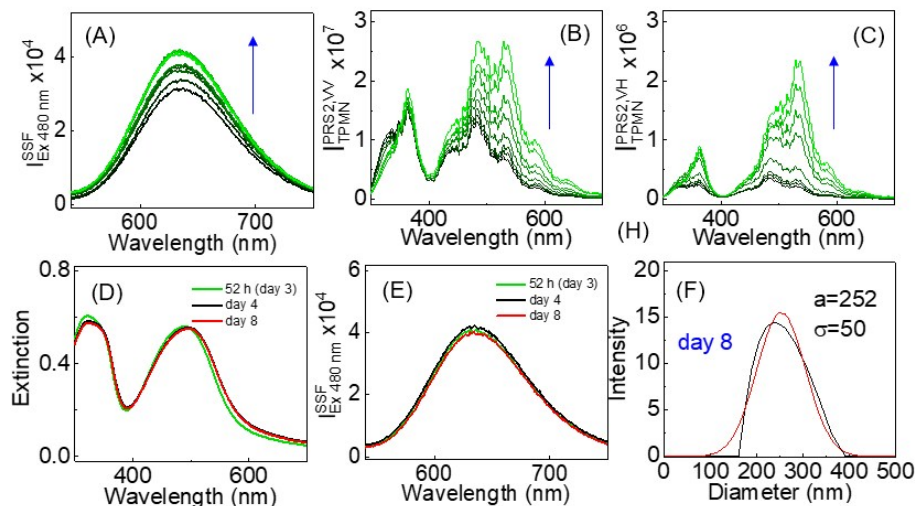

**Figure S4.** (A) as-acquired SSF, (B) PRS2 VV and (C) PRS2 VH spectra of 60  $\mu\text{M}$  aggregated TPMN in 90% water mixture as incubation time lasts from 10 minutes to 52 hours. The PRS2 spectra were acquired in a 10 mm  $\times$  10 mm cuvette with 1 nm slit width. (D) Comparisons of UV-vis extinction spectra of TPMN incubated for 52 hours, 4 days and 8 days. The ones at 4 days and 8 days overlaps with each other. (E) As-acquired SSF spectra of TPMN incubated for 52 hours, 4 days and 8 days. (F) DLS data for aggregated TPMN after 8-day incubation. The red line is curve-fitting with a Gaussian distribution with the specified mean  $a$  and standard derivation of  $\sigma$ .

## 5. Photographs and as-acquired data for disaggregation of TPMN aggregates

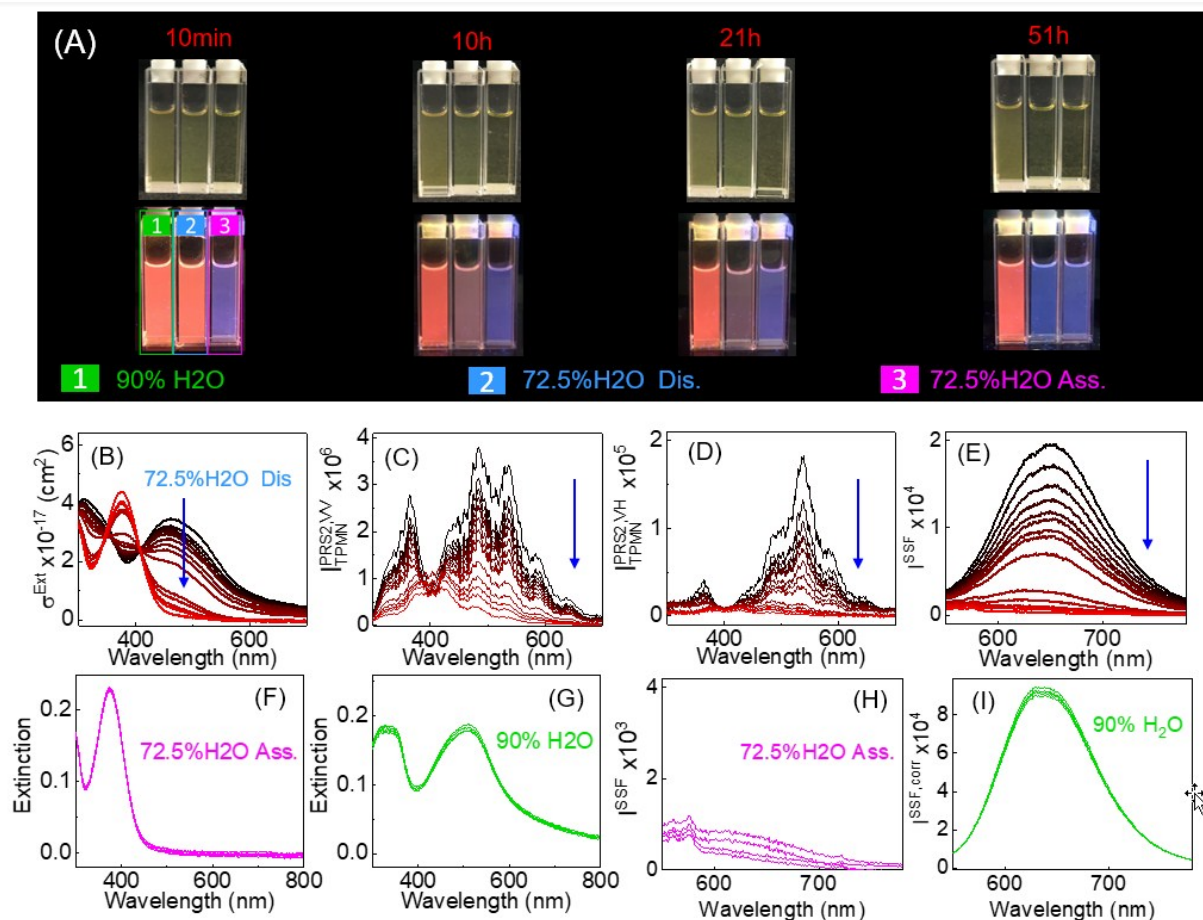

**Figure S5.** (A) White light and fluorescence photographs of samples at different time points: 20  $\mu\text{M}$  TPMN (left) in 90% H<sub>2</sub>O, (middle) disassembling in 72.5% H<sub>2</sub>O and (right) assembling in 72.5% H<sub>2</sub>O. (B) Extinction cross-section, (C) PRS2 VV, (D) PRS2 VH and (E) as-acquired SSF spectra of disassembling sample at different incubation time. The PRS2 spectra were acquired in a 10mm x 10mm cuvette with 1 nm slit width. Extinction spectra of (F) 72.5% H<sub>2</sub>O assembly TPMN and (G) 90% water TPMN sample. SSF spectra of (H) 72.5% H<sub>2</sub>O assembly TPMN and (I) 90% water TPMN sample at different incubation time.
